# Supplementary material
Source: bioRxiv or medRxiv preprint supplement (https://www.medrxiv.org/highwire/filestream/73723/field_highwire_adjunct_files/2/2020.03.12.20034991-3.pdf)

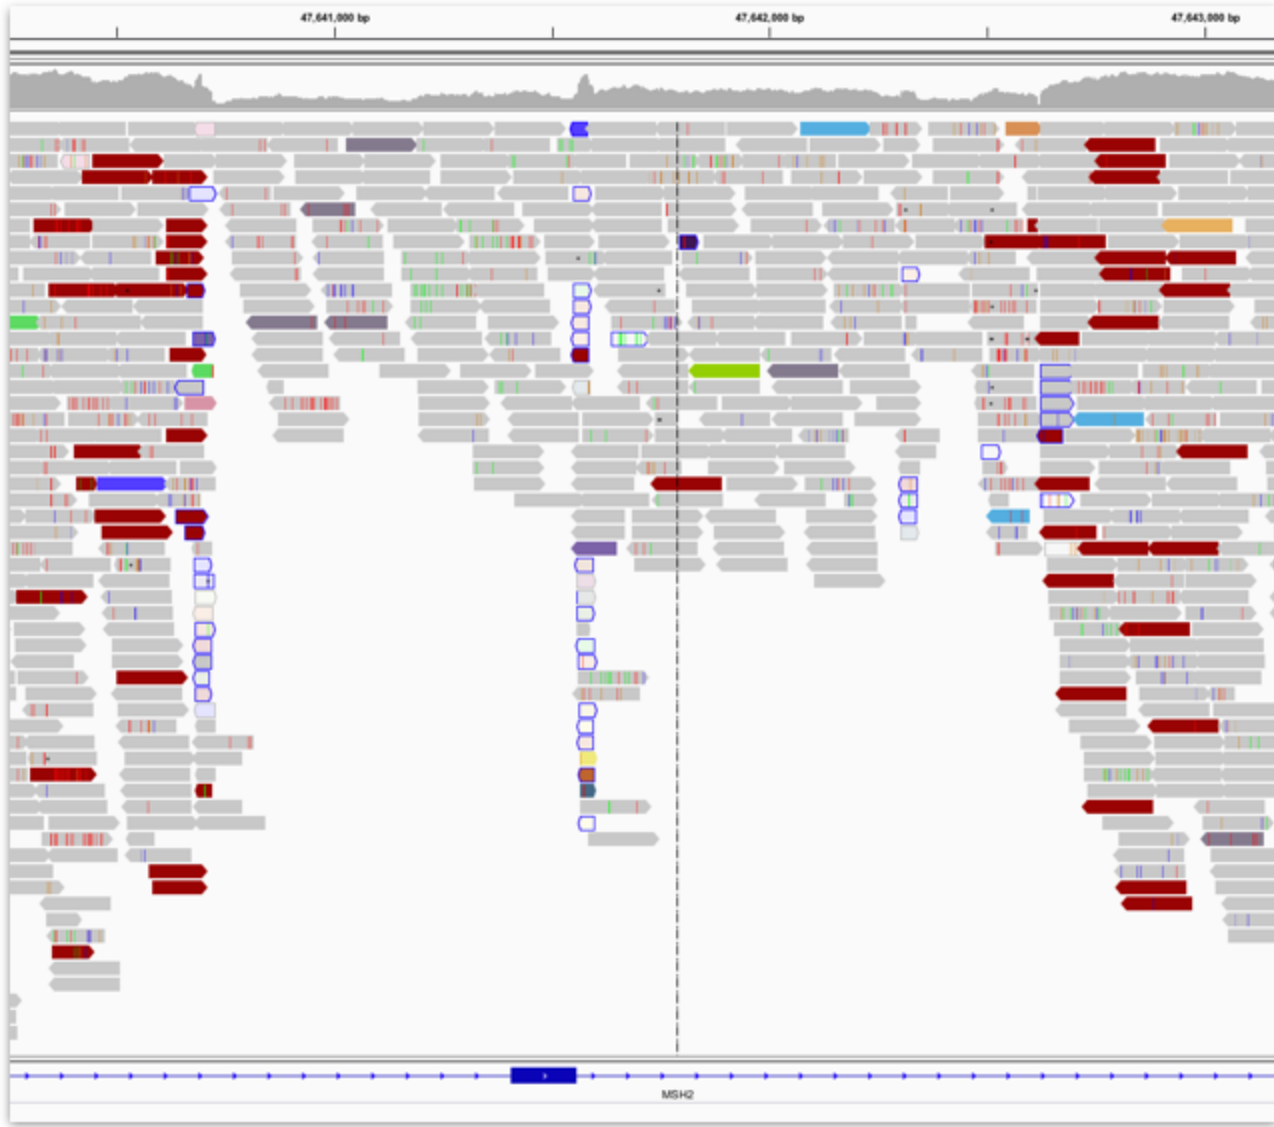

A

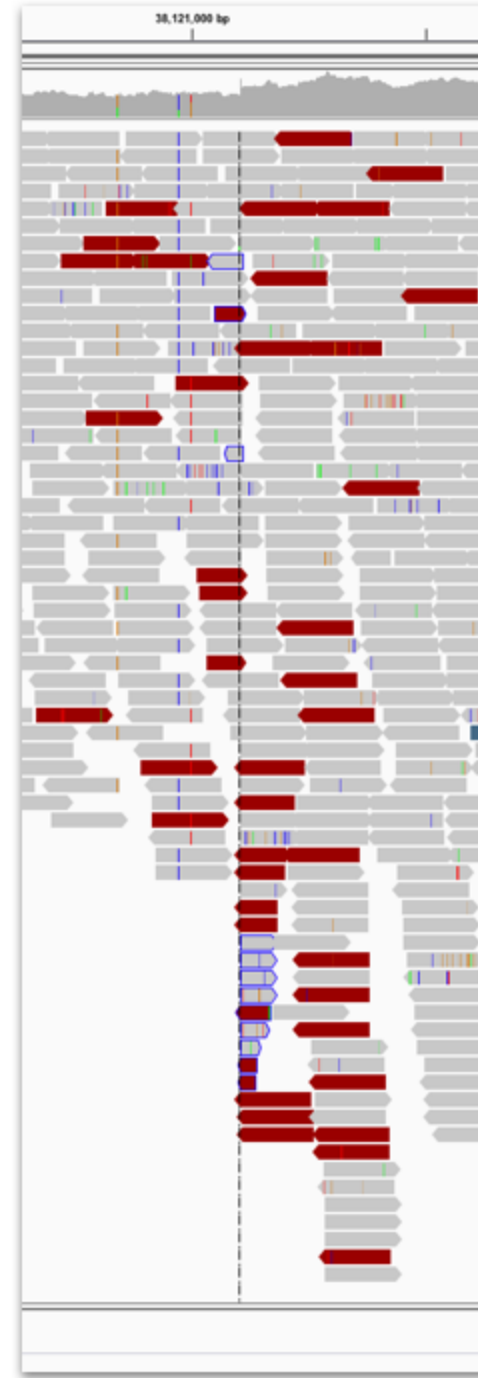

B

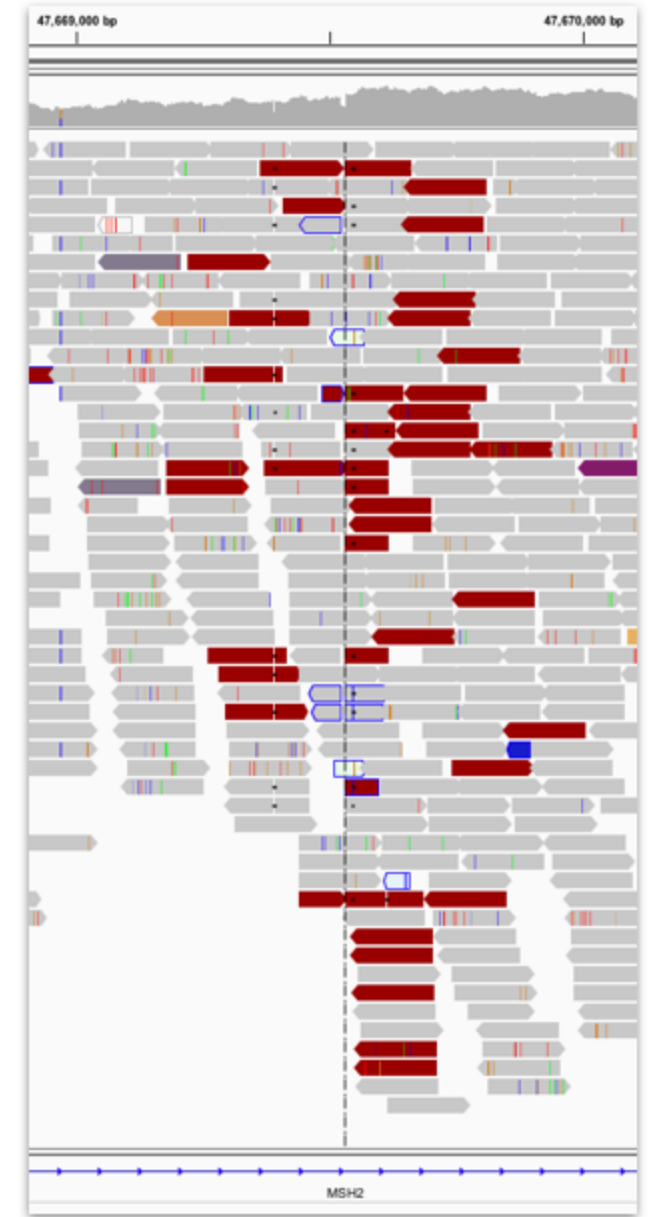

C

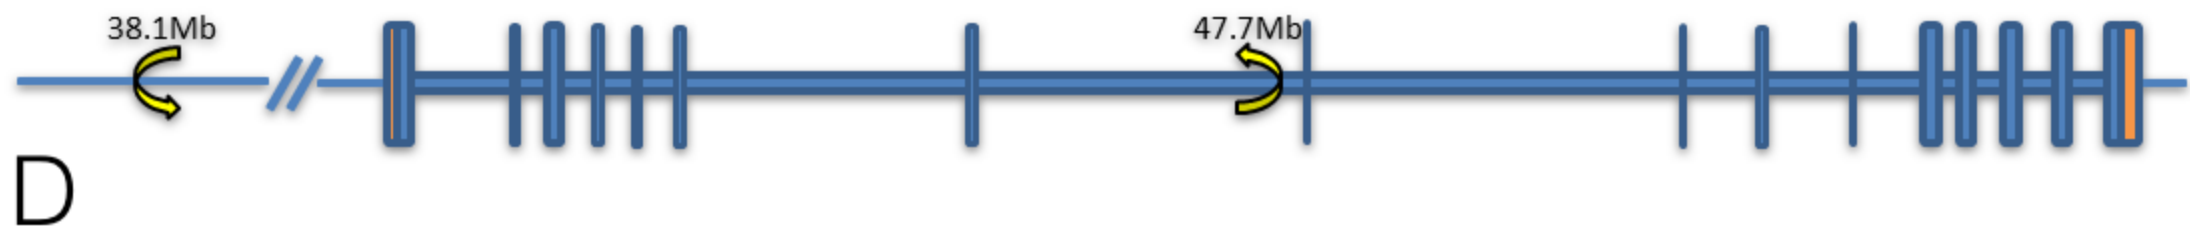

Supplement: Supplementary file [file 2020.03.12.20034991-3.pdf]
